# Supplementary material for: Effects of Apatite Concentrate in Combination with Phosphate-Solubilizing Microorganisms on the Yield of Ryegrass Cultivar Izorskiy
Source: MDPI journal article supplement (doi:10.3390/agronomy13061568), 2023-06-08

|                     | Experimental<br>variant | Biomass<br>wet weight,<br>g | Absolutely<br>dry weight,<br>g | Calcium, mg/kg        | Phosphorus,<br>mg/kg   | Fluorine,<br>mg/kg      | Strontium,<br>mg/kg |
|---------------------|-------------------------|-----------------------------|--------------------------------|-----------------------|------------------------|-------------------------|---------------------|
| Cut 1               | C-0                     | 32.12±2.32                  | 3.45±0.16                      | 10 320.00±562.62      | 4 060.00±260.02        | 5.04±0.08               | 25.40±2.11          |
|                     | C-NK                    | 41.70±3.96                  | 3.87±0.48                      | 13 800.00±960.18      | 3 200.00±247.92        | 5.96±1.88               | 30.20±2.43          |
|                     | 1                       | 41.48±5.32                  | 3.87±0.54                      | 13 400.00±999.39      | 3 180.00±226.88        | 5.00±0.00               | 28.60±2.37          |
|                     | 2                       | 40.15±6.97                  | 3.86±0.50                      | 12 200.00±1 567.97    | 2 880.00±209.27        | 5.00±0.00               | 27.20±3.12          |
|                     | 3                       | 34.38±11.23                 | 3.51±0.71                      | 14 200.00±960.18      | 3 140.00±170.87        | 5.38±0.74               | 31.80±2.73          |
|                     | 4                       | 39.12±3.86                  | 3.60±0.24                      | 13 800.00±1 440.27    | 3 100.00±205.56        | 5.00±0.00               | 30.60±3.26          |
|                     | 5                       | 35.73±1.23                  | 3.44±0.17                      | 12 800.00±733.35      | 2 800.00±185.94        | 5.00±0.00               | 27.80±1.90          |
|                     | 6                       | 40.10±2.13                  | 3.76±0.19                      | 14 000.20±0.39        | 3 140.00±99.94         | 5.26±0.51               | 30.80±1.14          |
|                     | 7                       | 38.83±3.61                  | 3.82±0.21                      | 12 600.00±480.09      | 2 820.00±226.88        | 5.04±0.08               | 28.60±1.00          |
|                     | 8                       | 39.86±3.19                  | 4.11±0.41                      | 13 600.00±999.39      | 2 980.00±144.03        | 5.68±1.33               | 30.00±1.86          |
|                     | 9                       | 37.59±3.76                  | 3.67±0.40                      | 14 200.00±1 440.27    | 3 100.00±87.65         | 5.10±0.20               | 30.40±1.59          |
|                     | 10                      | 38.43±3.78                  | 3.67±0.31                      | 13 400.00±1 329.31    | 3 000.00±196.00        | 5.00±0.00               | 29.40±2.95          |
|                     | F-value                 | 1.026                       | 0.993                          | 4.523                 | 10.122                 | 0.823                   | 2.305               |
|                     | p-value                 | 0.441                       | 0.468                          | 0.00015               | 7.595*10 <sup>-9</sup> | 0.617                   | 0.0248              |
|                     | LSD p<0.05              | -                           | -                              | 1479.87               | 293.29                 | -                       | 3.37                |
|                     | LSD p<0.01              | -                           | -                              | 1976.92               | 391.81                 | -                       | 4.51                |
| Cut 2               | C-0                     | 14.61±1.94                  | 2.02±0.28                      | 10 500.00±619.80      | 4 340.00±466.29        | 6.60±1.00               | 24.00±3.45          |
|                     | C-NK                    | 35.41±2.44                  | 3.52±0.56                      | 11 200.00±733.35      | 4 040.00±490.38        | 5.60±0.72               | 25.60±3.65          |
|                     | 1                       | 32.59±1.95                  | 3.30±0.45                      | 10 800.00±960.18      | 4 040.00±642.92        | 5.00±0.00               | 27.00±4.11          |
|                     | 2                       | 31.98±4.05                  | 3.35±0.15                      | 10 340.00±538.90      | 4 080.00±218.25        | 9.88±0.93               | 22.40±3.95          |
|                     | 3                       | 31.54±3.91                  | 3.16±0.48                      | 11 200.00±733.35      | 4 020.00±379.04        | 10.32±1.20              | 24.60±5.28          |
|                     | 4                       | 34.15±3.28                  | 3.20±0.46                      | 11 400.00±480.09      | 4 460.00±654.76        | 7.64±0.60               | 23.60±3.48          |
|                     | 5                       | 35.31±0.83                  | 3.47±0.09                      | 11 100.00±1 091.26    | 4 460.00±380.05        | 8.54±0.90               | 25.20±3.42          |
|                     | 6                       | 33.91±1.61                  | 3.44±0.31                      | 11 120.00±864.16      | 4 160.00±528.10        | 6.82±0.66               | 25.60±3.48          |
|                     | 7                       | 38.82±2.10                  | 3.74±0.44                      | 10 640.00±907.95      | 4 380.00±422.19        | 8.26±0.64               | 24.00±3.72          |
|                     | 8                       | 37.33±2.62                  | 3.81±0.43                      | 11 140.00±830.62      | 3 880.00±531.00        | 7.04±0.69               | 24.20±4.74          |
|                     | 9                       | 32.47±3.74                  | 3.39±0.48                      | 10 920.00±972.90      | 4 040.00±552.97        | 5.70±0.72               | 19.80±2.00          |
|                     | 10                      | 33.60±2.76                  | 3.33±0.18                      | 10 600.00±783.99      | 3 760.00±498.15        | 8.28±0.69               | 27.00±3.56          |
|                     | F-value                 | 11.260                      | 5.169                          | 0.705                 | 0.800                  | 16.963                  | 1.015               |
|                     | p-value                 | 1.55*10 <sup>-9</sup>       | 3.73*10 <sup>-5</sup>          | 0.727                 | 0.639                  | 2.133*10 <sup>-12</sup> | 0.449               |
|                     | LSD p<0.05              | 5.16                        | 0.56                           | -                     | -                      | 1.15                    | -                   |
|                     | LSD p<0.01              | 6.89                        | 0.75                           | -                     | -                      | 1.53                    | -                   |
| Cut 3               | C-0                     | 5.04±1.23                   | 0.85±0.22                      | 9 120.00±1 162.80     | 4 380.00±497.38        | 9.62±1.20               | 22.20±4.08          |
|                     | C-NK                    | 24.01±4.96                  | 3.03±0.55                      | 9 480.00±853.05       | 3 780.00±516.33        | 7.14±2.15               | 25.00±3.34          |
|                     | 1                       | 22.50±3.42                  | 2.99±0.47                      | 9 060.00±605.75       | 4 480.00±512.60        | 7.08±1.23               | 27.20±2.73          |
|                     | 2                       | 21.97±2.81                  | 2.83±0.50                      | 9 920.00±857.56       | 3 840.00±331.46        | 6.18±0.52               | 24.60±2.81          |
|                     | 3                       | 22.18±4.36                  | 2.57±0.31                      | 11 000.00±1 241.66    | 4 240.00±436.50        | 8.80±0.66               | 23.80±4.40          |
|                     | 4                       | 22.21±1.44                  | 2.52±0.26                      | 9 540.00±388.70       | 3 820.00±422.19        | 6.48±0.59               | 26.00±5.30          |
|                     | 5                       | 26.91±1.07                  | 3.37±0.33                      | 11 800.00±555.29      | 3 560.00±331.46        | 6.40±0.83               | 21.40±2.29          |
|                     | 6                       | 21.81±1.88                  | 2.82±0.61                      | 11 000.00±1 241.66    | 3 940.00±528.10        | 8.44±0.65               | 24.60±3.70          |
|                     | 7                       | 22.75±2.23                  | 2.94±0.48                      | 10 080.00±1 586.22    | 4 080.00±674.41        | 5.64±0.85               | 21.60±4.00          |
|                     | 8                       | 23.24±3.84                  | 2.84±0.57                      | 10 020.00±55.53       | 4 060.00±645.90        | 8.52±1.28               | 23.20±2.18          |
|                     | 9                       | 25.58±3.76                  | 3.33±0.57                      | 11 800.00±555.29      | 3 900.00±163.98        | 6.04±1.20               | 21.60±2.02          |
|                     | 10                      | 23.75±1.97                  | 2.87±0.42                      | 11 160.00±1 430.88    | 4 020.00±523.72        | 7.78±0.70               | 24.20±3.30          |
|                     | F-value                 | 10.043                      | 8.100                          | 7.289                 | 1.059                  | 5.069                   | 1.088               |
|                     | p-value                 | 8.51*10 <sup>-9</sup>       | 1.705*10 <sup>-7</sup>         | 6.74*10 <sup>-7</sup> | 0.415                  | 0.000045                | 0.392               |
|                     | LSD p<0.05              | 4.95                        | 0.65                           | 1039.14               | -                      | 1.61                    | -                   |
|                     | LSD p<0.01              | 6.62                        | 0.87                           | 1388.16               | -                      | 2.15                    | -                   |
| Underground<br>part | C-0                     | 4.39±0.32                   | 3.63±0.29                      | 9 040.00±844.38       | 2 500.00±185.94        | 18.14±4.24              | 21.80±1.14          |
|                     | C-NK                    | 10.41±0.77                  | 6.38±0.53                      | 10 340.00±538.90      | 1 880.00±144.03        | 16.86±3.81              | 22.00±1.75          |
|                     | 1                       | 10.46±2.93                  | 6.18±1.06                      | 11 800.00±1 142.85    | 1 780.00±114.28        | 8.12±2.79               | 25.40±1.92          |

|            |            |                       |                    |                        |                         |            |
|------------|------------|-----------------------|--------------------|------------------------|-------------------------|------------|
| 2          | 9.72±0.66  | 5.90±0.11             | 11 600.00±1 329.31 | 1 980.00±190.03        | 7.16±1.85               | 26.80±2.18 |
| 3          | 9.36±1.89  | 5.41±1.50             | 10 120.00±749.93   | 2 000.00±205.56        | 5.92±1.48               | 24.20±1.69 |
| 4          | 9.19±1.42  | 5.13±0.79             | 10 780.00±1 173.36 | 2 020.00±168.60        | 5.00±0.00               | 25.40±2.37 |
| 5          | 14.16±1.38 | 9.43±1.15             | 8 840.00±639.92    | 1 480.00±226.88        | 5.00±0.00               | 23.60±3.26 |
| 6          | 10.57±1.87 | 6.79±1.69             | 9 000.00±1 633.96  | 1 760.00±146.67        | 5.00±0.00               | 23.20±1.80 |
| 7          | 9.64±0.66  | 5.44±0.81             | 11 020.00±1 851.52 | 2 120.00±286.72        | 16.12±2.25              | 26.80±3.47 |
| 8          | 9.68±0.59  | 5.99±0.93             | 11 800.00±1 686.02 | 2 080.00±272.99        | 12.60±1.95              | 27.20±1.69 |
| 9          | 10.64±3.58 | 4.92±0.78             | 10 700.00±1 224.00 | 2 040.00±132.93        | 6.48±1.34               | 26.00±2.48 |
| 10         | 11.02±1.66 | 6.66±0.98             | 10 260.00±1 535.29 | 1 740.00±99.94         | 5.00±0.00               | 24.20±1.30 |
| F-value    | 4.668      | 7.397                 | 2.576              | 6.289                  | 22.553                  | 2.686      |
| p-value    | 0.00012    | 5.59*10 <sup>-7</sup> | 0.013              | 4.133*10 <sup>-6</sup> | 1.447*10 <sup>-14</sup> | 0.0098     |
| LSD p<0.05 | 4.95       | 1.45                  | 1877.89            | 286.61                 | 3.09                    | 3.20       |
| LSD p<0.01 | 6.62       | 1.94                  | 2508.63            | 382.87                 | 4.13                    | 4.28       |

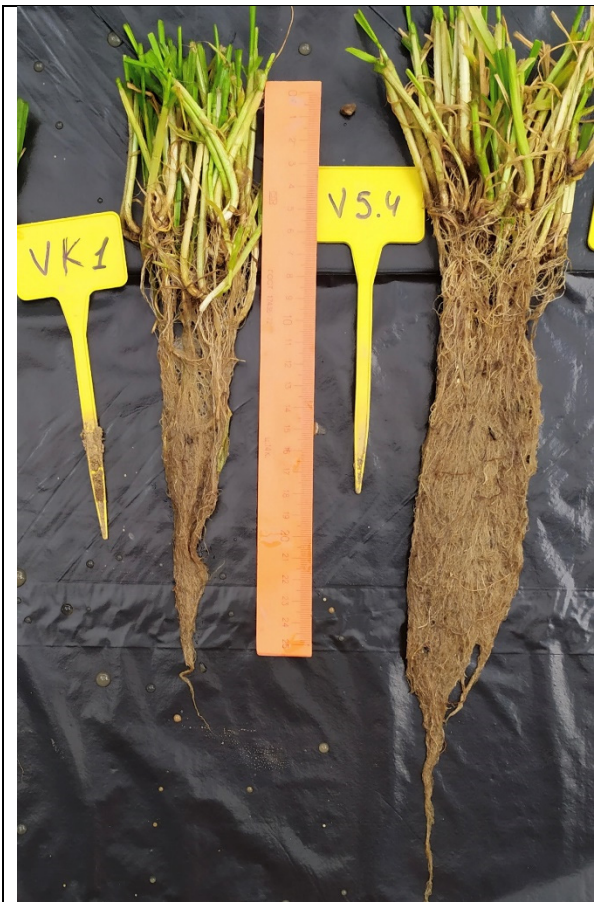

Supplement: s1 [file s1]
